# Supplementary material for: Development and Implementation of an HPV Vaccination Survey for American Indians in Cherokee Nation
Source: Int J Environ Res Public Health. 2021 Sep 1;18(17):9239. doi: 10.3390/ijerph18179239 (PMC8431656; doi:10.3390/ijerph18179239)
Supplement: Supplementary file 1 [file ijerph-18-09239-s001.zip]

Archive with 4 entries (4 files):
- Supplementary File 1_Final Survey.pdf
- Supplementary File 2_Informed Consent Form.pdf
- Supplementary File 3_Advance Letter.pdf
- Supplementary File 4_Cognitive Interview Guide.pdf
